# Supplementary material for: Contribution of physical processes to variability of dissolved silicate in the Labrador Sea between 1980 and 2015
Source: Copernicus journal article supplement (doi:10.5194/egusphere-2023-2538), 2023-12-14
Supplement: Supplementary file 1 [file egusphere-2023-2538-supplement.pdf]

## Supplementary Material

# Contribution of physical processes to variability of dissolved silicate in the Labrador Sea between 1980 and 2015.

Alizée Dale<sup>1</sup>, Marion Gehlen<sup>1</sup>, Douglas W.R. Wallace<sup>2</sup>, Germain Bénard<sup>1</sup>, Christian Éthé<sup>1</sup>, and Elena Alekseenko<sup>3</sup>

<sup>1</sup>Université Paris-Saclay, CNRS, CEA, UVSQ, Laboratoire des sciences du climat et de l'environnement, 91191, Gif-sur-Yvette, France.

<sup>2</sup>Department of Oceanography, Dalhousie University, Halifax, Nova Scotia, B3H 1N4 Canada

<sup>3</sup>Laboratoire d'Océanologie et de Géosciences, CNRS, LOG UMR 8187, 28 Avenue Foch, BP 80, 62930 Wimereux, France

October 30, 2023

### 1 Contents of this file

2 The supporting information presents the evaluation of model output for the Labrador Sea including:

- 3 1. the data sets selected for model evaluation (table [S1](#));
- 4 2. the evaluation of model output for the Labrador Sea (Fig. S2 to S6 and table [S2](#));
- 5 3. the external data sets used for model initialization (table [S3](#) and [S4](#));

## 6 1 Evaluation of model output for the Labrador Sea

### 7 1.1 Selection of period of analysis

8 The simulation started in 1958 from an ocean at rest. The time series (Fig. [S1](#)) of the volume of water  
9 integrated between OSNAP and the northern section (upper 450 m) highlights a period of rapid adjustment  
10 over the first years followed by a gradual decline to reach a quasi-steady-state from 1980 onwards with a  
11 clear seasonal cycle and some low frequency variability.

## 12 1.2 Evaluation of surface properties

13 In addition to the evaluation of simulated and observed dissolved silica (DSi) concentrations along the AR7W  
14 section presented in the main section, model output is evaluated hereafter for the Labrador Sea against sev-  
15 eral additional physical and biogeochemical data sets.

16 Simulated surface ocean 1981-2010 spring averages (April, May, June) of temperature, practical salinity, and  
17 DSi of the Labrador sea are compared in Fig. S2 to corresponding data extracted from the WOA2018. Model  
18 output was regridded on the regular WOA grid ( $1/4^\circ$  for temperature and salinity,  $1^\circ$  for DSi) prior to model-  
19 data comparison.

20 Modelled distributions of temperature (Fig. S2a) and salinity (Fig. S2b) reflect the surface ocean circulation  
21 in the Labrador Sea: inflow of cold and fresh waters from the Arctic which feed the southward flowing Baffin  
22 Current along the coast of Baffin Island, inflow of northward-flowing, warm Atlantic waters to the west of  
23 Greenland (West Greenland Current, i.e. WGC , West Greenland Slope Current, i.e. WGSC). The signature of  
24 the DSi-rich Arctic inflow is seen in the modelled DSi distribution, with a gradient from the Canadian coast  
25 towards the center of the basin (Fig. S2c). The model represents colder (Fig. S2d) and fresher (Fig. S2e) wa-  
26 ters in the northern part of the domain and along the Canadian coast. Temperature and salinity biases stem  
27 from the Arctic inflow and propagate along the coast with the Baffin Current. They are intensified along the  
28 east coast of Baffin Island and Labrador Sea. Modelled surface waters are too warm in the north-eastern  
29 Labrador Sea and over the WGC , as well as to the south of the domain (offshore Labrador). A mostly small  
30 positive salinity bias is found over the same regions. Temperature and salinity biases are small in the center  
31 of the Labrador Sea where deep winter convection takes place. A see-saw pattern is found for temperature  
32 with, in the model, colder waters to the North and slightly warmer waters to the South. It is associated with  
33 a near-zero bias over the same area in salinity. This see-saw pattern south of Greenland (Cape Farewell)  
34 mirrors the contrast between the low-salinity WGC (negative bias in temperature) and the warm and salty  
35 WGSC [Østerhus et al., 2019]. This reflects the presence of strong contrast between Atlantic (WGC) and Arc-  
36 tic waters (EGC, WGSC) in the model. The concentration of DSi is overestimated over the whole region as  
37 discussed in the main text.

38

## 39 1.3 Evaluation along the Davis Strait section

40 Figure S3 displays cross-sections across Davis Strait for temperature, salinity, and DSi. Data is taken from the  
41 September 2004 R/V Knorr cruise (table S1). The bias is computed as the difference between the model's  
42 nearest grid point and the observation, and its relative observation point. Temperature and salinity are over-

43 estimated in the model at the surface and down to approximately 200 m. The positive bias extends deepest  
44 at the west of the section, and shallows towards the east. Temperature is underestimated in underlying  
45 waters, whereas salinity bias is close to zero. Simulated DSi concentrations are slightly overestimated in the  
46 upper 100 meters of the water column and underestimated with depth. Average biases and standard devia-  
47 tions computed over the 0 to 450 m depth layer, the focus of this paper, are:  $0.96 \pm 0.53^\circ\text{C}$  for temperature,  
48  $0.35 \pm 0.28$  PSU for salinity, and  $-0.17 \pm 1.57 \mu\text{M}$  for DSi.

49

#### 50 **1.4 Evaluation of mean vertical profiles**

51 Figure S4 compares the temporal mean (1981-2010) of regionally-averaged profiles of conservative temper-  
52 ature, practical salinity, and DSi concentration between OSNAP and the Northern section as a function of  
53 depth. The figures suggest that the model is slightly saltier over the full water column with a maximal bias of  
54 0.25 PSU at the surface. Bias in temperature is maximal at the surface ( $+1.3^\circ\text{C}$  in the model) and minimal at  
55 1600 m ( $+0.05^\circ\text{C}$ ). The mean temperature is overestimated in the model from the surface down to 1500 m  
56 and below 3000 m. It agrees with observations between 1500 m and 3000 m. Modelled DSi concentrations  
57 agree well with WOA2018 data until 50 m of depth. The model underestimates DSi concentration down to  
58 2000 m of depth. Below 2000 m, modelled DSi concentrations are overestimated. The overestimation of  
59 DSi at depth likely reflects a too large contribution of Antarctic Bottom Waters (AABW) rich in DSi along with  
60 an underestimation of dense overflows from the Nordic seas.

61

#### 62 **1.5 Evaluation of DSi interannual variability and trends**

63 This section complements section 3.1 and figure 1b of the main text. It (i) provides the absolute values of DSi  
64 concentration across the AR7W section in the model and observation datasets, (ii) highlights the statistical  
65 relationship between the observations and the model concentration, and (iii) shows the spatial differences  
66 between the model and the observations along the section.

67 The linear regression has a slope of 0.58 with  $R^2 = 0.71$  (p-value  $< 0.01$ ; Fig. S5b). Hence the model dynamics  
68 explain 82 % of the variance of the observations. The variability in DSi concentration is concentrated in the  
69 first 200 km of the section (i.e., its western edge; Fig. S5c) in the observations while it is focused on the  
70 eastern part of the section in the model.

71

## 72 1.6 Evaluation of Mixed Layer Depth

73 The yearly mean MLD (Fig. S6a) is underestimated over most of the domain, with a notable exception in the  
74 center of the Labrador Sea, where modelled MLDs exceed those observed by up to 330 m (Fig. S6b). The  
75 region-wide bias stems from underestimating winter MLDs when MLD peaks and deepwater convection  
76 occurs (Fig. S6c). The density criterion used to define the MLD could be responsible for the overestima-  
77 tion at the center of the Labrador sea in the model. According to [Courtois et al., 2017], it is not the most  
78 suitable criterion during strong deep convection events as it is subject to temperature-salinity compensa-  
79 tion leading to the overestimation by the model. It could be better to use a temperature or salinity-based  
80 method [Courtois et al., 2017]. However, the winter-time deep convection location in the model seems to  
81 be in agreement with the observations.

82 The annual maximum MLD in the model is compared to the annual maximum MLD observation-based es-  
83 timates from [Yashayaev and Loder, 2016] over the same region (Fig. S6d). Observations show a gradual  
84 decrease in maximum MLD from 1994 onwards whereas the model shows a sharp drop in MLD between  
85 1994 and 1995, followed by a period of low values and low variability. Until 2007, the annual maximum MLD  
86 decreased by  $-29.6$  m/y ( $p$ -value  $< 0.03$ ). MLD extrema in the model and the observations do not always  
87 coincide. In addition, the model exhibits variability on the 2-4 years time scale of relatively high magnitude  
88 compared to the observations. The observed MLD decreases linearly at a rate of  $-114.5$  m/yr ( $p$ -value  $< 0.01$ )  
89 between 1994 and 2007. This contrasts with the model which exhibits high amplitude interannual variability,  
90 particularly a sharp drop between 1993 and 1995.

91

## 92 1.7 Evaluation of the transport across Davis Strait, the Northern section and OSNAP

93 Simulated net volume and DSI transports were computed along the Northern section and OSNAP sections,  
94 and are compared to data-based assessments in Table S2. Net volume transports (integration of the Eule-  
95 rian velocity and the eddy-induced velocity) are computed online at the temporal resolution of the ocean  
96 general circulation model (900 sec) before monthly averaging. DSI transport was computed off-line as  
97 the product of the monthly net transport rates and monthly DSI concentrations. While the simulated vol-  
98 ume transport across the Northern section is coherent with the long-term mean estimate (2004-2010) of  
99 [Curry et al., 2014], it is only half of that used by [Torres-Valdés et al., 2013] for summer 2005 ( $1.6 \pm 0.2$  Sv  
100 across the Northern section in the model). While the volume transport varies seasonally, with a maximum  
101 reached in summer due to the contribution of ice melt [Curry et al., 2014], the difference between the long-  
102 term mean and the summer estimates exceeds the range of seasonal variability. [Torres-Valdés et al., 2013]

103 derived velocities for volume and tracer transports from an inverse box model representing the Arctic Ocean,  
104 which is different from the approach taken in this study and is likely to contribute to the difference in vol-  
105 ume transport. The difference in volume transport between this study and that of [Torres-Valdés et al., 2013]  
106 across the Davis Strait is also found in DSI transport. Combining the volume transport and the DSI transport  
107 from [Torres-Valdés et al., 2013], we compute an average DSI concentration of 13.8  $\mu\text{M}$  in waters crossing  
108 the Davis Strait, which is only slightly higher than in the model (12.3  $\mu\text{M}$ ).

109 At OSNAP, the simulated net volume transport between 1980 and 2015 exceeds that at the northern bound-  
110 ary by 0.1 Sv, while being within the estimate by [Lozier et al., 2019] for the 2004-2010 long term mean.  
111 Modelled mean net volume transports across the two sections fall within the range of standard deviations  
112 of independent estimates. A slightly higher transport across OSNAP is expected due to the contribution of  
113 water leaving the Canadian Arctic Archipelago through the Hudson Strait.

114

Table S1: Main characteristics of observation-based products used for model evaluation. <sup>a</sup>The MLD is based on a density difference with respect to the surface of 0.01 kg/m<sup>3</sup>.

| Products                                                      | Variables                                                                                       | Time scale     | Source                                                                                                                 |
|---------------------------------------------------------------|-------------------------------------------------------------------------------------------------|----------------|------------------------------------------------------------------------------------------------------------------------|
| R/V Knorr cruise at Davis Strait                              | Temperature, Salinity, DSi, NO <sub>3</sub> <sup>-</sup>                                        | 2004           | [Lee et al., 2004] <a href="https://cchdo.ucsd.edu/cruise/316N20040922">https://cchdo.ucsd.edu/cruise/316N20040922</a> |
| Combination of Argo data and mooring CTD processed at the BIO | MLD <sup>a</sup>                                                                                | 1980-2017      | [Yashayaev and Loder, 2016, Raimondi et al., 2021]                                                                     |
| World Ocean Atlas 2018 Re-analysis (WOA2018)                  | Temperature, salinity, DSi, NO <sub>3</sub> <sup>-</sup> , PO <sub>4</sub> and MLD <sup>a</sup> | 1981-2010 mean | [Boyer et al., 2018] <a href="https://www.ncei.noaa.gov/">https://www.ncei.noaa.gov/</a>                               |

Table S2: Net volume and DSi transports across Davis Strait, the Northern section and OSNAP.

| Mean ± SD                                      | Northern section for model output/Davis Strait for data |                            | OSNAP                     |                            |
|------------------------------------------------|---------------------------------------------------------|----------------------------|---------------------------|----------------------------|
|                                                | Net volume transport (Sv)                               | Net DSi transport (kmol/s) | Net volume transport (Sv) | Net DSi transport (kmol/s) |
| Model Long term mean 1980-2015                 | NS: -1.6 ± 0.7                                          | NS: -18.8 ± 5.9            | -1.7 ± 0.7                | -17.6 ± 12.3               |
| [Torres-Valdés et al., 2013] Summer 2005       | -3.1 ± 0.3                                              | -42.9 ± 5.2                | NA                        | NA                         |
| [Curry et al., 2014] Long term mean 2004-2010  | -1.6 ± 0.2                                              | NA                         | NA                        | NA                         |
| [Lozier et al., 2019] Long term mean 2004-2010 | [Curry et al., 2014]                                    | NA                         | -1.6 ± 0.2                | NA                         |
| Model Long term mean 2004-2010                 | NS: -1.4 ± 0.7                                          | NS: -15.01 ± 4.3           | -1.4 ± 0.7                | -11.3 ± 11.3               |

Table S3: Characteristics of model initialization

| Elements                                    | Sources                                          |
|---------------------------------------------|--------------------------------------------------|
| Conservative Temperature, Absolute salinity | World Ocean Atlas 2013 [Locarnini et al., 2013]  |
| Nitrate, Silicate, Phosphorus and Oxygen    | World Ocean Atlas 2009 [Garcia et al., 2009]     |
| Iron and DOC                                | PISCES outputs [Aumont et al., 2015]             |
| Alkalinity                                  | Glodap v2 [Olsen et al., 2016]                   |
| DIC                                         | Glodap Pre-industrial DIC [Lauvset et al., 2016] |

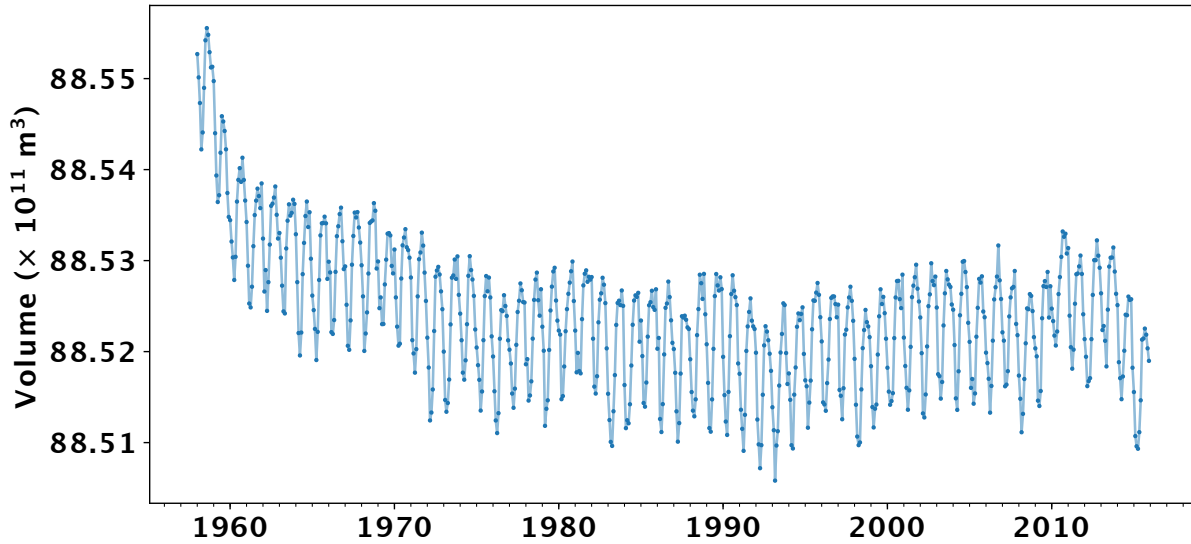

Figure S1: Monthly averaged volume of water integrated over the first 450 m between OSNAP and the Northern section.

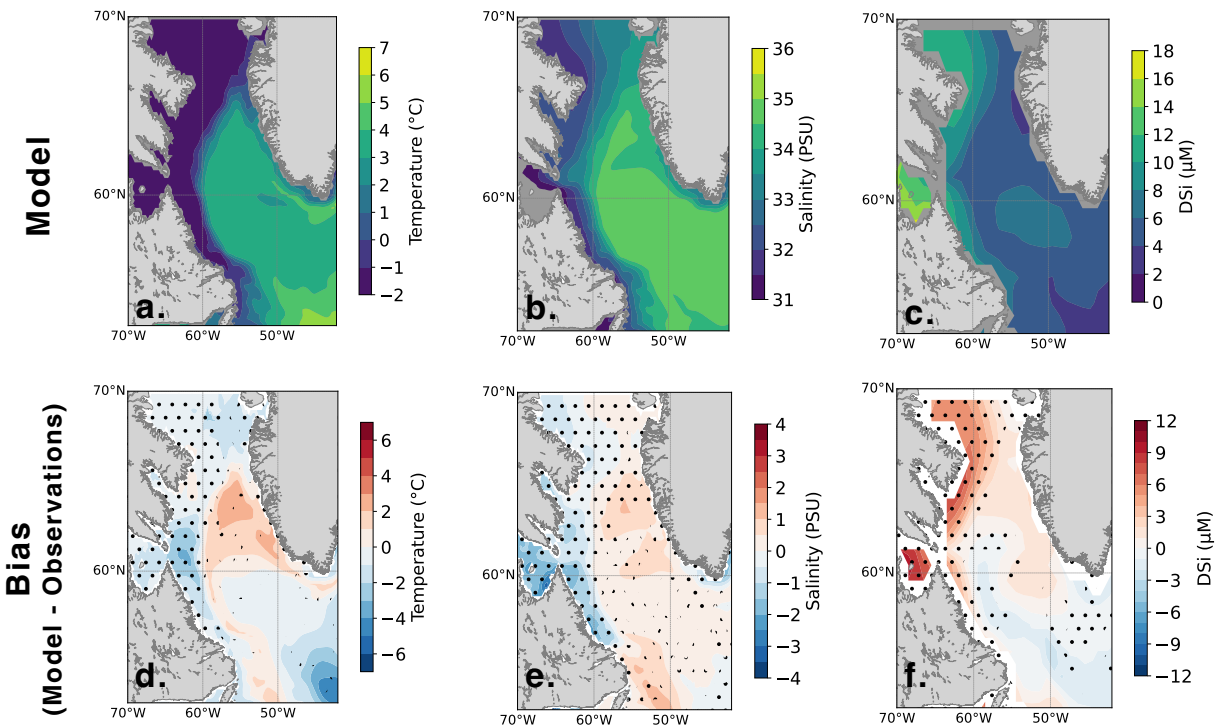

Figure S2: Surface ocean averages for spring (AMJ) of conservative temperature ( $^{\circ}\text{C}$ ), salinity (PSU), and DSI concentration ( $\mu\text{M}$ ). (a) to (c) model output, (d) to (f) average biases between model output and WOA2018. Temperature and salinity data from the WOA2018 dataset have a  $1/4^{\circ}$  resolution, and DSI has a  $1^{\circ}$  resolution. Model outputs have been remapped on the WOA2018 grid for both sets of figures. Stippling highlight field interpolation area, i.e. areas where observations are absent.

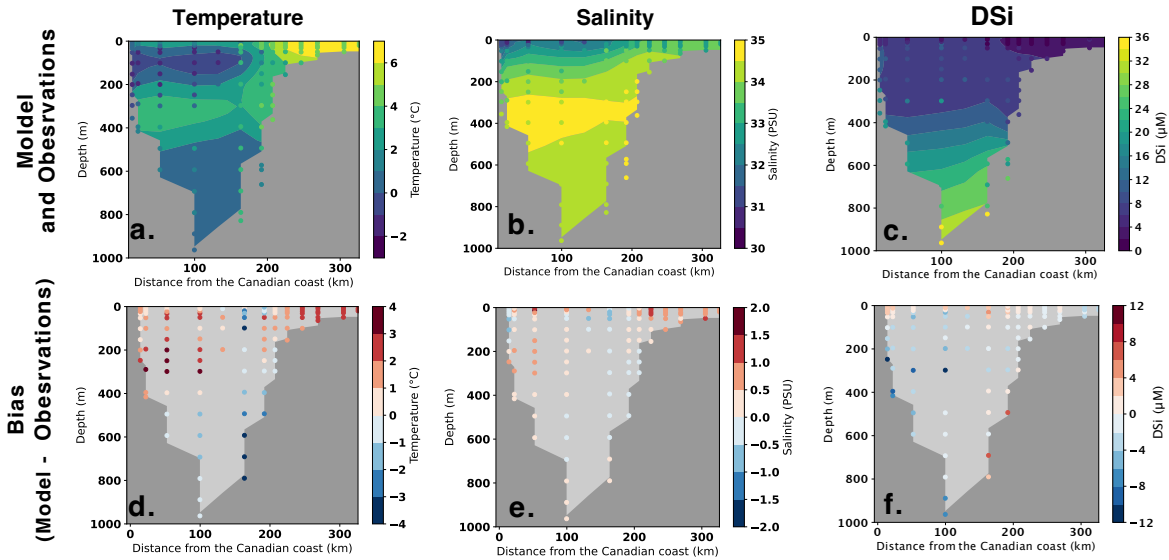

Figure S3: Comparison of model output and observations for (a) temperature, (b) salinity, and (c) DSi along Davis Strait in September 2004. Modelled distributions are displayed as colored fields with discrete samples overlain as dots (same color scale). Panels (d) to (f) show the bias (model - observations) after co-localizing model output on the model grid.

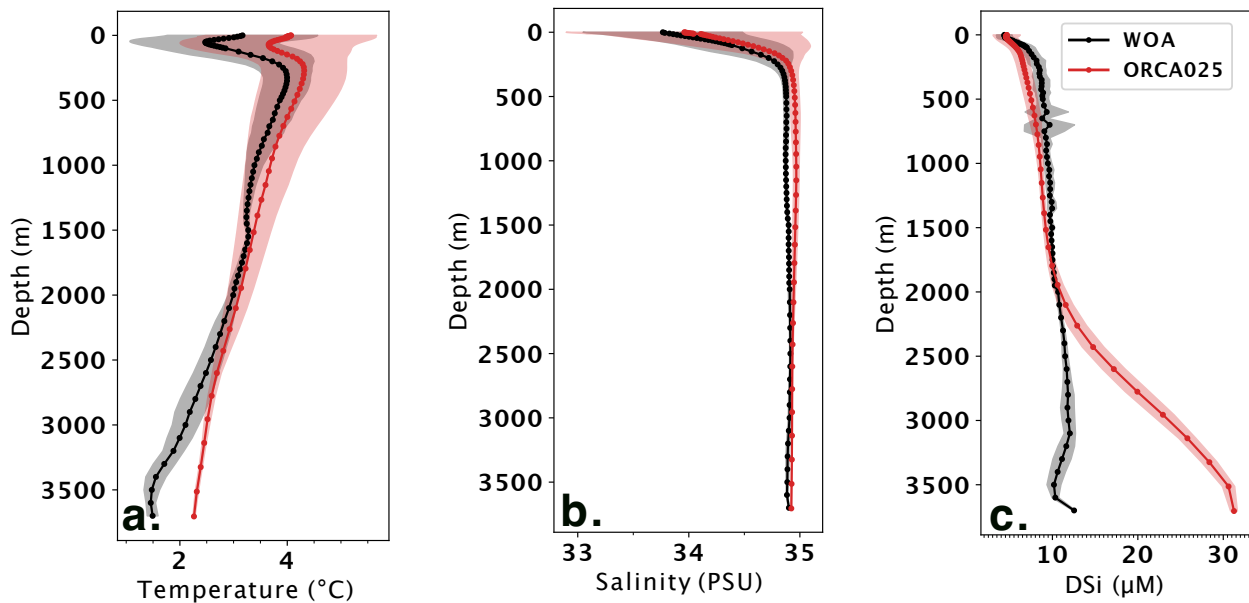

Figure S4: Mean vertical profiles for the period 1981-2010 of: (a) temperature, (b) salinity, and (b) DSi concentration averaged between the OSNAP section and the Northern section. Observational data from the WOA2018 dataset are shown with black lines and shading; model output is represented with red lines and shading. The shaded area represents one standard deviation.



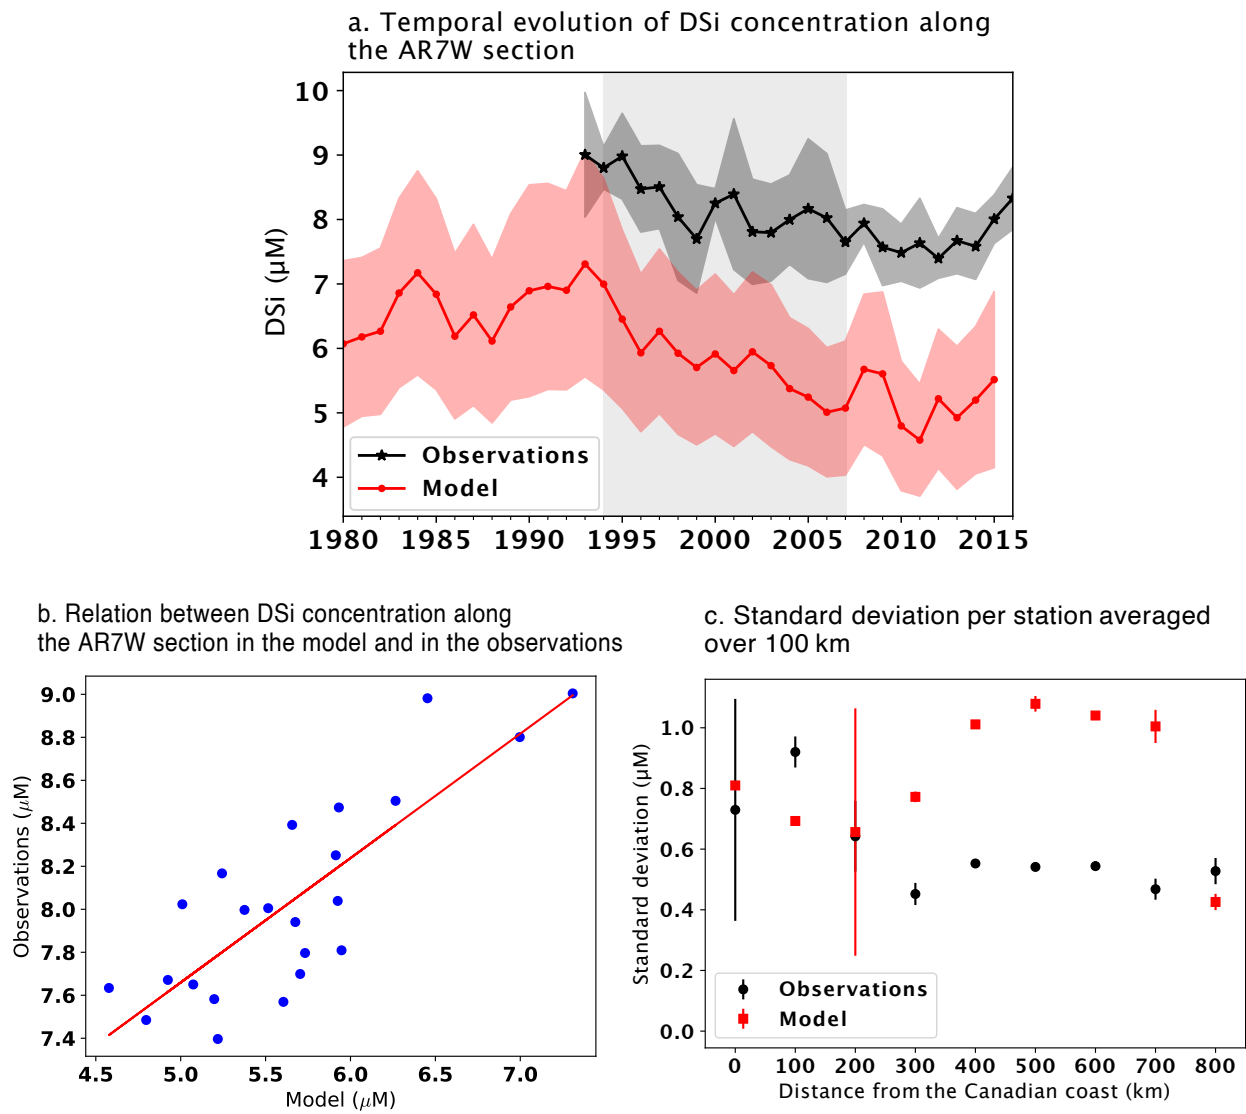

Figure S5: Evolution of AR7W DSi concentration from the observation-based data and in the model. a. Temporal evolution of DSi concentration of the upper 450 m along the AR7W section as observed and simulated in ORCAO25. The average bias is  $2.3 \mu\text{M}$  (see main text) b. Relation between DSi concentration along the AR7W section in the model and the observations.

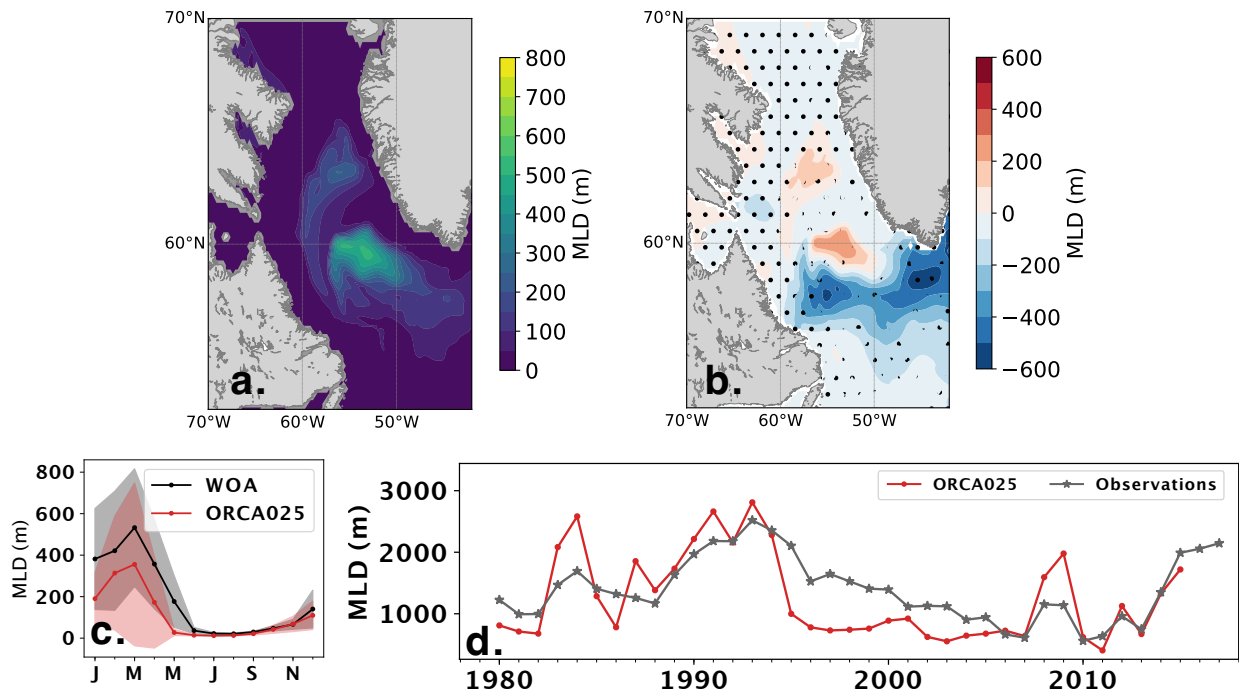

Figure S6: Evaluation of modelled Mixed Layer Depth over the period from 1980 to 2010: (a) average MLD in the model after remapping on the regular WOA2018 grid (1/4° resolution); (b) bias (model - data) between modelled and observed mean MLD ; (c) seasonal cycle of mean MLD (solid lines, red for model and black for WOA), shading represents the spatial standard deviation for the region between OSNAP and the study area's northern boundary ; (d) time series of annual maximum MLD in the Labrador Sea from the observation-based values derived by Yashayaev and Loder (2016) (gray), and from the model (red).

Table S4: List of PISCES external inputs adapted from Aumont et al. (2015)

| <b>Inputs</b>       | <b>Elements</b> | <b>Sources</b>                                                                                                         |
|---------------------|-----------------|------------------------------------------------------------------------------------------------------------------------|
| Dust deposition     | Fe, Si, P       | LMDZOR-INCA chemistry model [Boucher et al., 2020, Lurton et al., 2020]                                                |
| Nitrogen deposition | N               | NCAR ( <a href="https://esgf-node.llnl.gov/projects/input4mips/">https://esgf-node.llnl.gov/projects/input4mips/</a> ) |
| River supply        | all elements    | GLOBAL NEWS2 data set [Mayorga et al., 2010]                                                                           |

## References

- 115
- 116 [Aumont et al., 2015] Aumont, O., Éthé, C., Tagliabue, A., Bopp, L., and Gehlen, M. (2015). Pisces-v2: an  
117 ocean biogeochemical model for carbon and ecosystem studies. *Geoscientific Model Development Dis-*  
118 *cussions*, 8(2).
- 119 [Boucher et al., 2020] Boucher, O., Servonnat, J., Albright, A. L., Aumont, O., Balkanski, Y., Bastrikov, V.,  
120 Bekki, S., Bonnet, R., Bony, S., Bopp, L., et al. (2020). Presentation and evaluation of the ipsl-cm6a-lr  
121 climate model. *Journal of Advances in Modeling Earth Systems*, 12(7):e2019MS002010.
- 122 [Boyer et al., 2018] Boyer, T. P., García, H. E., Locarnini, R. A., Zweng, M. M., Mishonov, A. V., Reagan, J. R.,  
123 Weathers, K. A., Baranova, O. K., Paver, C. R., Seidov, D., et al. (2018). World ocean atlas.
- 124 [Courtois et al., 2017] Courtois, P., Hu, X., Pennelly, C., Spence, P., and Myers, P. G. (2017). Mixed layer depth  
125 calculation in deep convection regions in ocean numerical models. *Ocean Modelling*, 120:60–78.
- 126 [Curry et al., 2014] Curry, B., Lee, C., Petrie, B., Moritz, R., and Kwok, R. (2014). Multiyear volume, liquid  
127 freshwater, and sea ice transports through davis strait, 2004–10. *Journal of Physical Oceanography*,  
128 44(4):1244–1266.
- 129 [Garcia et al., 2009] Garcia, H., Locarnini, R., Boyer, T., Antonov, J., Zweng, M., Baranova, O., and Johnson,  
130 D. (2009). World ocean database 2009, vol 4: nutrients (phosphate, nitrate, silicate). *US government*  
131 *printing office, Washington, DC*.
- 132 [Lauvset et al., 2016] Lauvset, S. K., Key, R. M., Olsen, A., Van Heuven, S., Velo, A., Lin, X., Schirnick, C., Kozyr,  
133 A., Tanhua, T., Hoppema, M., et al. (2016). A new global interior ocean mapped climatology: The 1 × 1  
134 glodap version 2. *Earth System Science Data*, 8(2):325–340.
- 135 [Lee et al., 2004] Lee, C. M., Petrie, B., Gobat, J. I., Soukhovtsev, V., and Abriel, J. (2004). An observational  
136 array for high-resolution, year-round measurements of volume, freshwater, and ice flux variability in davis  
137 strait: Cruise report for r/v knorr 179-05, 22 september-4 october 2004. Technical report, WASHINGTON  
138 UNIV SEATTLE APPLIED PHYSICS LAB.
- 139 [Locarnini et al., 2013] Locarnini, R., Mishonov, A., Antonov, J., Boyer, T., Garcia, H., Baranova, O., Zweng,  
140 M., Paver, C., Reagan, J., Johnson, D., et al. (2013). World ocean atlas 2013, volume 1: Temperature, edited  
141 by: Levitus, s. A. *Mishonov Technical Ed., NOAA Atlas NESDIS*, 73:40.

142 [Lozier et al., 2019] Lozier, M. S., Li, F., Bacon, S., Bahr, F., Bower, A. S., Cunningham, S., de Jong, M. F.,  
143 de Steur, L., deYoung, B., Fischer, J., et al. (2019). A sea change in our view of overturning in the subpolar  
144 north atlantic. *Science*, 363(6426):516–521.

145 [Lurton et al., 2020] Lurton, T., Balkanski, Y., Bastrikov, V., Bekki, S., Bopp, L., Braconnot, P., Brockmann, P.,  
146 Cadule, P., Contoux, C., Cozic, A., et al. (2020). Implementation of the cmip6 forcing data in the ipsl-  
147 cm6a-lr model. *Journal of Advances in Modeling Earth Systems*, 12(4):e2019MS001940.

148 [Mayorga et al., 2010] Mayorga, E., Seitzinger, S. P., Harrison, J. A., Dumont, E., Beusen, A. H., Bouwman,  
149 A., Fekete, B. M., Kroeze, C., and Van Drecht, G. (2010). Global nutrient export from watersheds 2 (news  
150 2): model development and implementation. *Environmental Modelling & Software*, 25(7):837–853.

151 [Olsen et al., 2016] Olsen, A., Key, R. M., Van Heuven, S., Lauvset, S. K., Velo, A., Lin, X., Schirnack, C., Kozyr,  
152 A., Tanhua, T., Hoppema, M., et al. (2016). The global ocean data analysis project version 2 (glodapv2)–an  
153 internally consistent data product for the world ocean. *Earth System Science Data*, 8(2):297–323.

154 [Østerhus et al., 2019] Østerhus, S., Woodgate, R., Valdimarsson, H., Turrell, B., De Steur, L., Quadfasel, D.,  
155 Olsen, S. M., Moritz, M., Lee, C. M., Larsen, K. M. H., et al. (2019). Arctic mediterranean exchanges: A  
156 consistent volume budget and trends in transports from two decades of observations. *Ocean Science*,  
157 15(2):379–399.

158 [Raimondi et al., 2021] Raimondi, L., Tanhua, T., Azetsu-Scott, K., Yashayaev, I., and Wallace, D. W. (2021). A  
159 30-year time series of transient tracer-based estimates of anthropogenic carbon in the central labrador  
160 sea. *Journal of Geophysical Research: Oceans*, 126(5):e2020JC017092.

161 [Torres-Valdés et al., 2013] Torres-Valdés, S., Tsubouchi, T., Bacon, S., Naveira-Garabato, A. C., Sanders, R.,  
162 McLaughlin, F. A., Petrie, B., Kattner, G., Azetsu-Scott, K., and Whitledge, T. E. (2013). Export of nutrients  
163 from the arctic ocean. *Journal of Geophysical Research: Oceans*, 118(4):1625–1644.

164 [Yashayaev and Loder, 2016] Yashayaev, I. and Loder, J. W. (2016). Recurrent replenishment of labrador sea  
165 water and associated decadal-scale variability. *Journal of Geophysical Research: Oceans*, 121(11):8095–  
166 8114.
